# Supplementary material for: A Novel Detection Model and Its Optimal Features to Classify Falls from Low- and High-Acceleration Activities of Daily Life Using an Insole Sensor System
Source: PubMed Central journal article supplement (PMC5948845; doi:10.3390/s18041227), 2018-04-17
Supplement: sensors-18-01227-s001.pdf [file sensors-18-01227-s001.pdf]

Supplementary Material

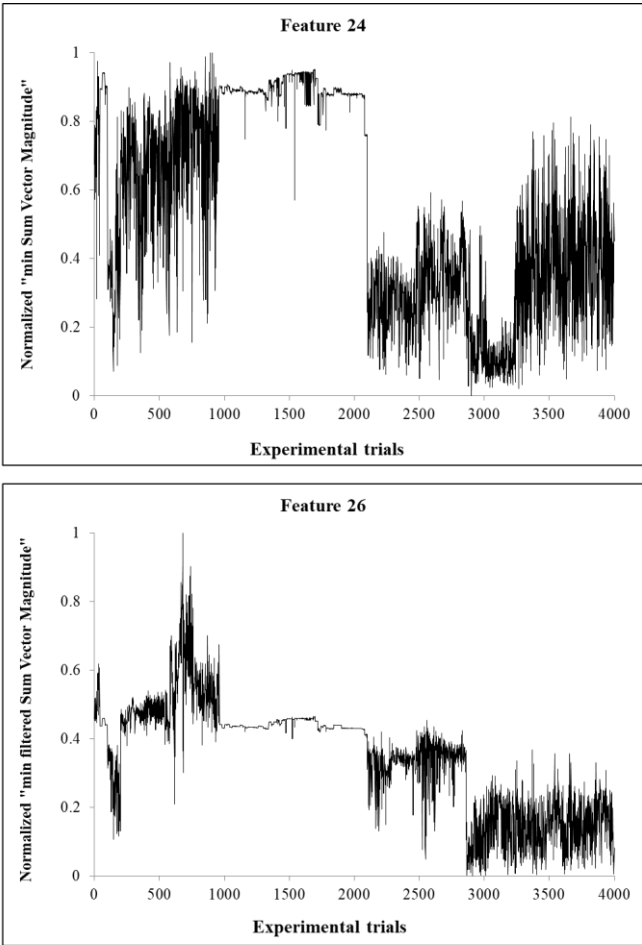

- 1-400 : Walk**
- 401-800 : Run**
- 801-1200 : Stand**
- 1201-1600 : Lying**
- 1601-2000 : Sit**
- 2001-2400 : Upstairs**
- 2401-2800 : Downstairs**
- 2801-3200 : Jump**
- 3201-4000 : Falling**

Figure S1. Comparison of features 24 and 26 across all experimental trials.
